# Supplementary material for: Analysis of the Vigor of Pinus hartwegii Lindl. along an Altitudinal Gradient Using UAV Multispectral Images: Evidence of Forest Decline Possibly Associated with Climatic Change
Source: MDPI journal article supplement (doi:10.3390/f14061176), 2023-06-06
Supplement: s1 [file s1]

## Supplementary material

Table S1. Spectral information of the bands for the DJI Phantom 4 Multispectral UAV (P4M).

| Banda         | Central wavelength (nm) | Wavelength width (nm) |
|---------------|-------------------------|-----------------------|
| Blue          | 450                     | 32                    |
| Green         | 560                     | 32                    |
| Red           | 650                     | 32                    |
| Red-edge      | 730                     | 32                    |
| Near-infrared | 840                     | 52                    |

Table S2. Characteristics of the flight missions conducted along the altitudinal gradient where *Pinus hartwegii* is distributed.

| Flight number | Flight date | Time of flight | Duration of flight (min) | Length of the mission (m) | Altitudinal range (masl) |
|---------------|-------------|----------------|--------------------------|---------------------------|--------------------------|
| 1             | 07/04/2022  | 11:20 h        | 30                       | 1110                      | 4040 - 3700              |
| 2             | 07/04/2022  | 13:09 h        | 29                       | 928                       | 3700 - 3560              |
| 3             | 08/04/2022  | 11:13 h        | 45                       | 1680                      | 3560 - 3400              |
| 4             | 08/04/2022  | 12:11 h        | 23                       | 625                       | 3400 - 3300              |

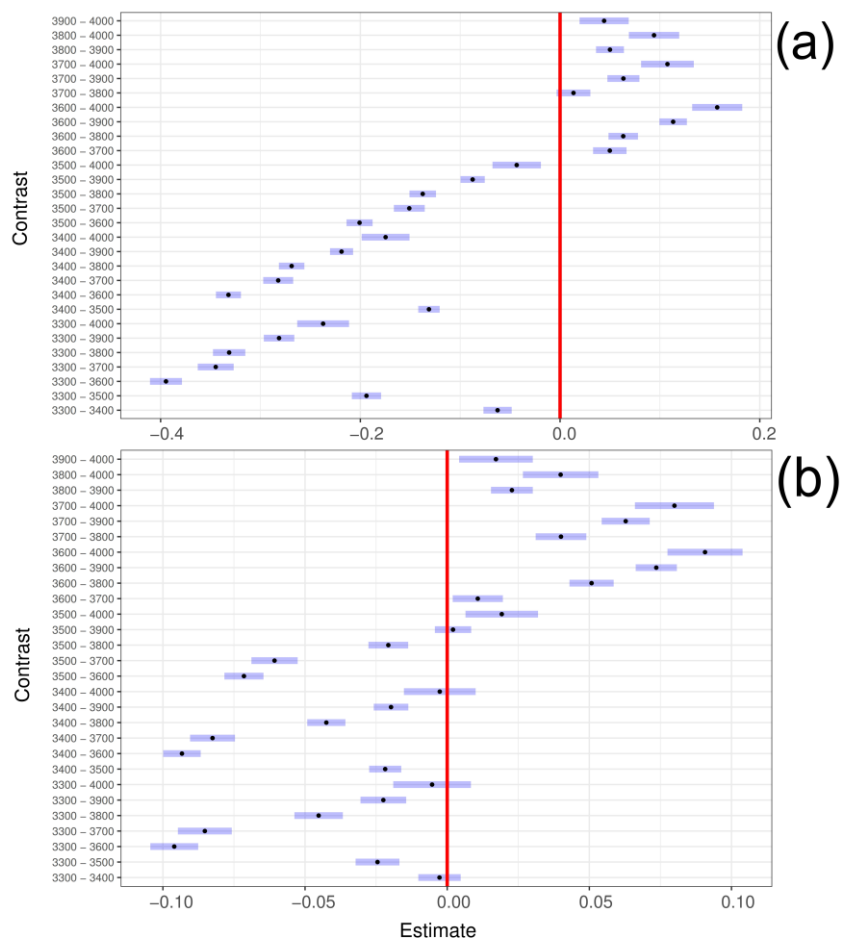

Figure S1. Difference of the vegetation index means. (a) Normalized difference vegetation index (NDVI); (b) Leaf chlorophyll index (LCI).

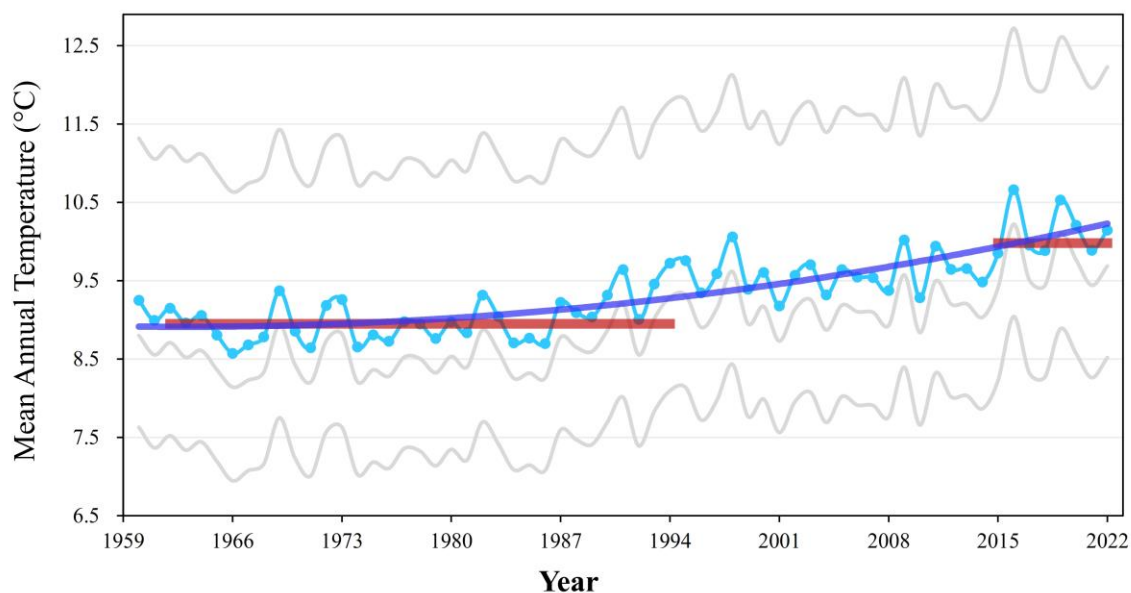

Figure S2. Trend of the Mean Annual Temperatures (MAT) from the study area (gray lines: high, low and medium altitude sites; blue symbols: average among high, medium and low altitude sites; thick dark blue line is the average trend after a regression) for the period 1960-2022. Red horizontal lines indicate the average for the reference period 1961-1990 (left longer line) and for the decade preceding our study (2011-2020; right shorter line).

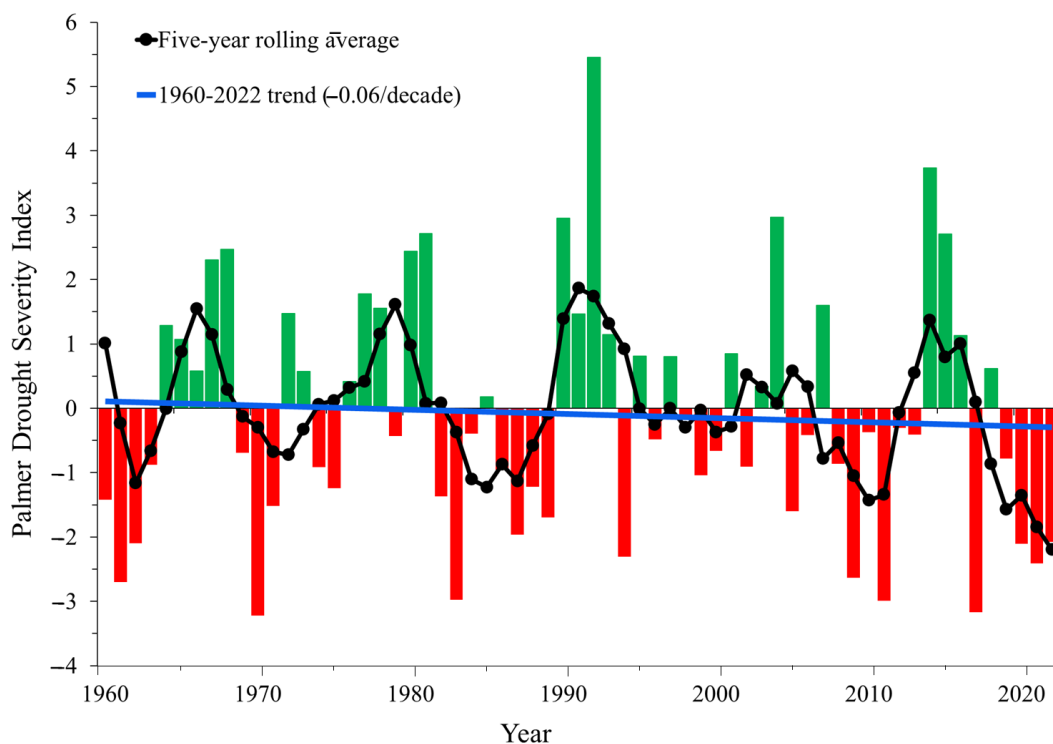

Figure S3. Annual values of the Palmer Drought Severity Index (PDSI) of the xeric limit of the transect (low altitude). Black line is a five-year rolling-average; blue line is a linear regression to indicate the overall trend.
